# Supplementary material
Source: PubMed Central journal article supplement (PMC4515576)

**Table S1:** Available data on outcomes at each wave amongst youth with complete predictor data at the previous wave (wave 14(n=6,140), wave 16 (n=5,069))

|                      | Wave 16+      | Wave 18+      |
|----------------------|---------------|---------------|
| Depression           | 4,254 (69.3%) | 2,828 (54.4%) |
| Anxiety disorder     | 4,126 (67.2%) | 3,237 (62.2%) |
| Drug use             | 4,155 (67.7%) | 2,214 (42.6%) |
| Binge drinking       | 3,755 (61.1%) | 2,637 (50.7%) |
| Deliberate self-harm | 3,760 (61.2%) | 3,237 (62.2%) |
| BMI                  | 4,113 (67.0%) | 3,459 (66.5%) |

**Figure S1:** Detail of years at each assessment (on timeline) and nature of assessment (white: predictors; light grey: outcomes from face to face assessments and interviews, dark grey: questionnaires)

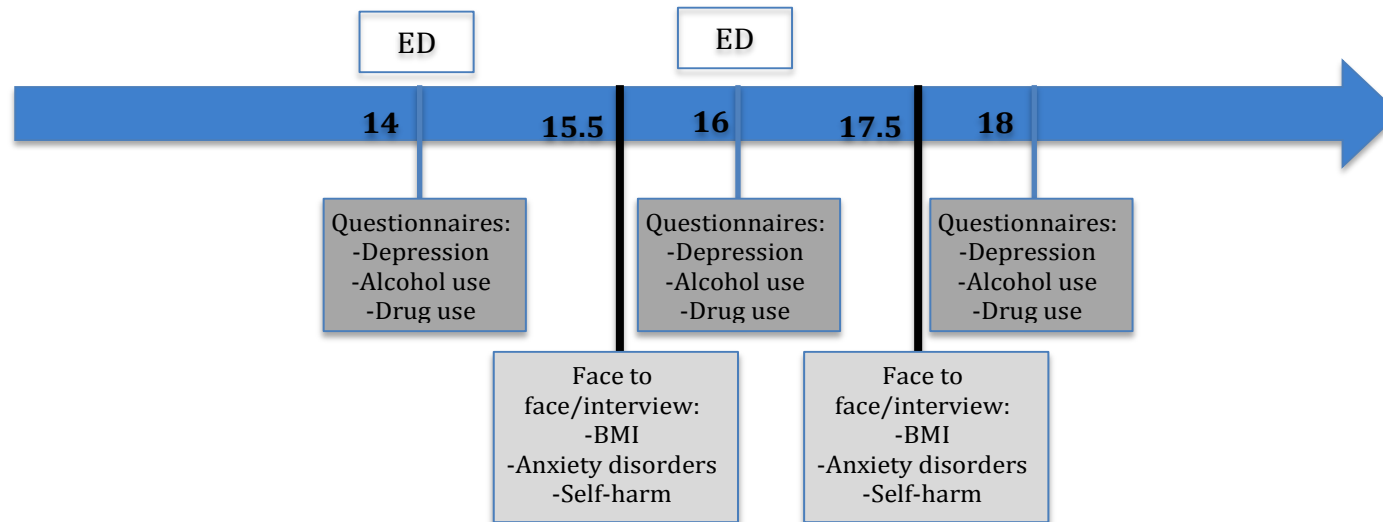

Supplement: NIHMS697714-supplement-1.pdf [file NIHMS697714-supplement-1.pdf]
